# Supplementary material
Source: PubMed Central journal article supplement (PMC3628766)
Supplement: NIHMS418330-supplement-02.pdf [file NIHMS418330-supplement-02.pdf]

**Table S2. Sharp Backbone Kinks in RNA Structures**

| PDB ID | Chain | Nucleotide Number | Nucleotide Name | Angle <sup>a</sup> | Molecule                                                                   |
|--------|-------|-------------------|-----------------|--------------------|----------------------------------------------------------------------------|
| 1ET4   | A     | 214               | A               | 47.77              | vitamin B(12) RNA aptamer                                                  |
| 1SDS   | D     | 210               | U               | 50.44              | protein L7Ae bound to a K-turn derived from an archaeal box H/ACA sRNA     |
| 1MMS   | C     | 1071              | G               | 42.36              | ribosomal protein L11-RNA complex                                          |
| 1S72   | 0     | 1105              | C               | 46.29              | <i>H. marismortui</i> large ribosomal subunit                              |
| 1S72   | 0     | 1369              | A               | 46.57              | <i>H. marismortui</i> large ribosomal subunit                              |
| 1S72   | 0     | 1533              | A               | 49.82              | <i>H. marismortui</i> large ribosomal subunit                              |
| 1S72   | 0     | 174               | A               | 50.64              | <i>H. marismortui</i> large ribosomal subunit                              |
| 1S72   | 0     | 1776              | A               | 48.93              | <i>H. marismortui</i> large ribosomal subunit                              |
| 1S72   | 0     | 2007              | A               | 47.82              | <i>H. marismortui</i> large ribosomal subunit                              |
| 1S72   | 0     | 212               | A               | 50.76              | <i>H. marismortui</i> large ribosomal subunit                              |
| 1S72   | 0     | 357               | A               | 49.23              | <i>H. marismortui</i> large ribosomal subunit                              |
| 1S72   | 0     | 893               | C               | 49.73              | <i>H. marismortui</i> large ribosomal subunit                              |
| 1XMQ   | A     | 508               | C               | 49.27              | t6A37-ASLLysUUU AAA-mRNA bound to the decoding center                      |
| 1MSY   | A     | 2654              | A               | 50.58              | GUAA tetraloop mutant of Sarcin/Ricin domain from <i>E. coli</i> 23 S rRNA |
| 4FAQ   | A     | 1                 | G               | 50.12              | <i>O. iheyensis</i> group II intron before 5' exon hydrolysis              |
| 4E8K   | B     | 6                 | U               | 137.6              | <i>O. iheyensis</i> group II intron before SER                             |

<sup>a</sup>: defined as the angle formed by three consecutive phosphorus atoms.

**Table S3. Properties of the Different Metal Ions Used in This Work**

| metal class                 | ion              | cationic radius (Å) <sup>a</sup> | hydration energy (kJ/mol) <sup>b, d</sup> | Lewis acid strength <sup>a</sup> | absolute hardness (η) <sup>b, c, e</sup> | absolute electronegativity (χ) <sup>b, e</sup> |
|-----------------------------|------------------|----------------------------------|-------------------------------------------|----------------------------------|------------------------------------------|------------------------------------------------|
| alkaline metal ions         | Li <sup>+</sup>  | 0.60                             | -514.10                                   | 0.188                            | 35.12                                    | 40.52                                          |
|                             | Na <sup>+</sup>  | 0.95                             | -405.40                                   | 0.148                            | 26.21                                    | 21.08                                          |
|                             | K <sup>+</sup>   | 1.33                             | -334.72                                   | 0.112                            | 17.99                                    | 13.64                                          |
|                             | Rb <sup>+</sup>  | 1.48                             | -310.50                                   | 0.102                            | 11.70                                    | 15.77                                          |
|                             | Cs <sup>+</sup>  | 1.69                             | -278.00                                   | 0.094                            | 10.60                                    | 14.50                                          |
| other monovalent metal ions | Tl <sup>+</sup>  | 1.49                             | -325.90                                   | 0.120                            | 7.16                                     | 13.27                                          |
| alkali earth metal ions     | Mg <sup>2+</sup> | 0.65                             | -1922.10                                  | 0.334                            | 47.59                                    | 32.55                                          |
|                             | Ca <sup>2+</sup> | 0.99                             | -1592.40                                  | 0.274                            | 19.52                                    | 31.39                                          |
|                             | Ba <sup>2+</sup> | 1.35                             | -1303.70                                  | 0.195                            | 12.80                                    | na                                             |

a: (Brown, 1988); b: (Feig and Uhlenbeck, 1999); c: (Essington, 2005); d: (Payzant et al., 1973); e: absolute hardness (η) and absolute electronegativity (χ) are defined according to Pearson (Pearson, 1988); na = not available ; dark green indicates strong and light green weak X-ray anomalous scattering properties.

## References

- Brown, I.D. (1988). What factors determine cation coordination numbers? *Acta Crystallogr. B* *44*, 545–553.
- Essington, M.E. (2005). *Soil and water chemistry: an integrative approach* (Boca Raton: CRC Press).
- Feig, A.L., and Uhlenbeck, O.C. (1999). The role of metal ions in RNA biochemistry. In *The RNA world*, R.F. Gesteland, T.R. Cech, and J.F. Atkins, eds. (New York: Cold Spring Harbor Laboratory Press), pp. 287–320.
- Payzant, J.D., Cunningh, A.J., and Kebarle, P. (1973). Gas-phase solvation of ammonium ion by NH<sub>3</sub> and H<sub>2</sub>O and stabilities of mixed clusters NH<sub>4</sub><sup>+</sup>(NH<sub>3</sub>)<sub>n</sub>(H<sub>2</sub>O)<sub>w</sub>. *Can. J. Chem.* *51*, 3242–3249.
- Pearson, R.G. (1988). Absolute Electronegativity and Hardness - Application to Inorganic-Chemistry. *Inorg. Chem.* *27*, 734–740.

**Table S4. Kinetic Parameters of the Wild-Type Intron and Mutants**

| Construct | $k_1^a$         | $k_2^a$         |
|-----------|-----------------|-----------------|
| wt        | 100             | 100             |
| G288A     | $0.79 \pm 0.08$ | $1.49 \pm 0.29$ |
| G288C     | $1.87 \pm 1.08$ | $1.22 \pm 0.42$ |
| G288U     | $10.1 \pm 1.75$ | $4.96 \pm 1.33$ |
| C377A     | $69.4 \pm 7.14$ | $38.4 \pm 16.6$ |
| C377G     | $9.53 \pm 1.28$ | $2.66 \pm 0.01$ |
| C377U     | $214 \pm 35.4$  | $105 \pm 15.8$  |

<sup>a</sup>: first ( $k_1$ ) and second ( $k_2$ ) splicing step rates for the indicated mutants relative to wild type (wt,  $k_1 = 0.011 \pm 0.003 \text{ min}^{-1}$ ,  $k_2 = 0.094 \pm 0.012 \text{ min}^{-1}$ , set to 100 %). The standard deviation was calculated from three independent experiments.
