# Supplementary material
Source: PubMed Central journal article supplement (PMC3628766)
Supplement: NIHMS418330-supplement-03.pdf [file NIHMS418330-supplement-03.pdf]

# Visualizing Group II Intron Catalysis through the Stages of Splicing

Marco Marcia<sup>1</sup> and Anna Marie Pyle<sup>1,2,3,\*</sup>

<sup>1</sup>Department of Molecular, Cellular and Developmental Biology

<sup>2</sup>Department of Chemistry

Yale University, New Haven, CT 06511, USA

<sup>3</sup>Howard Hughes Medical Institute, Chevy Chase, MD 20815, USA

\*Correspondence: [anna.pyle@yale.edu](mailto:anna.pyle@yale.edu)

<http://dx.doi.org/10.1016/j.cell.2012.09.033>

## SUMMARY

Group II introns are self-splicing ribozymes that share a reaction mechanism and a common ancestor with the eukaryotic spliceosome, thereby providing a model system for understanding the chemistry of pre-mRNA splicing. Here we report 14 crystal structures of a group II intron at different stages of catalysis. We provide a detailed mechanism for the first step of splicing, we describe a reversible conformational change between the first and the second steps of splicing, and we present the ligand-free intron structure after splicing in an active state that corresponds to the retrotransposable form of the intron. During each reaction, the reactants are aligned and activated by a heteronuclear four-metal-ion center that contains a metal cluster and obligate monovalent cations, and they adopt a structural arrangement similar to that of protein endonucleases. Based on our data, we propose a model for the splicing cycle and show that it is applicable to the eukaryotic spliceosome.

## INTRODUCTION

Group II introns are self-splicing ribozymes that are essential for gene expression in many organisms. In addition to their impact on modern RNA metabolism, they are important model systems for understanding pre-mRNA splicing, because they share a common ancestor with the spliceosomal machinery that is required for splicing of pre-mRNAs in eukaryotes (Pyle and Lambowitz, 2006). Excised group II introns are important catalysts for genomic diversification because they reverse-splice into DNA and incorporate themselves into new genomic locations through retrotransposition (Dai and Zimmerly, 2002). Given their profound and continuing impact on gene expression and evolution in all domains of life (Mattick, 1994) and their widespread applications in biotechnology (García-Rodríguez et al., 2011), it is important to understand the chemical mechanism of group II intron catalysis.

Fundamental insights into the mechanisms of RNA cleavage and ligation by group II introns have been obtained through

biochemical experiments and from crystal structures of the *Oceanobacillus iheyensis* group IIC intron (Pyle and Lambowitz, 2006; Toor et al., 2008a). These studies have revealed an intricate architectural scaffold that encloses a catalytic pocket within its core. The pocket is formed by three highly conserved motifs that are joined into a triple helix containing nucleotides from the conserved “catalytic triad” of intron domain 5 (D5, C358-G359-C360), the two-nucleotide bulge of D5 (A376-C377), and the J2/3 junction (A287-G288-C289). The resulting motif binds two divalent ions (M1 and M2) that participate directly in the mechanism of chemical catalysis (Gordon and Piccirilli, 2001; Toor et al., 2008a; Toor et al., 2008b). However, the lack of information on other metals near the active site, and on the position of key reactants, had so far precluded a clear understanding of group II intron and, potentially, spliceosomal catalysis.

To address these issues, we present an extensive set of intron crystal structures obtained at different stages of the splicing reaction in the presence of diverse metal ion cofactors. In this way, we define key structural elements necessary for hydrolytic group II intron splicing, including a heteronuclear metal ion center within the active site and the position of the reaction nucleophile. We report the structure of the excised intron in an alternative conformation and, on the basis of mutagenesis and in vitro splicing data, we show that it is involved in the second step of splicing. Our results lead us to propose a functional model for group II intron splicing in which the J2/3 motif toggles between two alternative conformations during the transition from the first to the second step of splicing. This model agrees with functional and structural data available for the nuclear spliceosome and has important implications for understanding the structural basis for all pre-mRNA splicing.

## RESULTS

### Visualizing the First Step of Splicing

To determine the structure of the intron at sequential stages of catalysis, we created two constructs that contain *O. iheyensis* group II intron domains 1–5 with and without a short 5' exon (Oi5eD1–5 and OiD1–5, respectively). These optimized constructs, which are fully active ribozymes, lack flexible sections that had been included in previous studies (Toor et al., 2008a), thereby facilitating strict control over the binding of reaction substrates and oligonucleotide ligands.

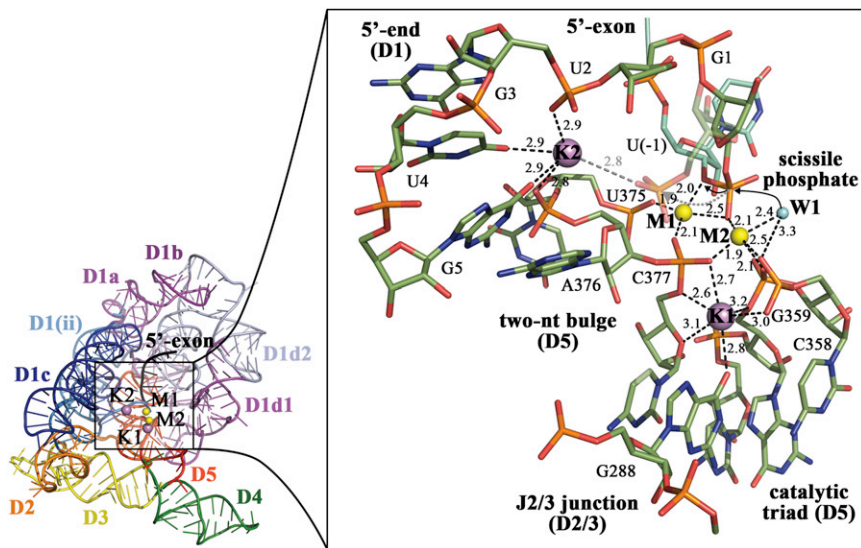

**Figure 1. The Mechanism of the First Splicing Step by Hydrolysis**

The OI5eD1-5 ribozyme solved in the presence of  $K^+/Ca^{2+}$  at 3.1 Å resolution (left). The inset shows a magnification into the active site (distances are depicted as black dotted lines and are indicated in angstroms). Two divalent ions (M1 and M2, yellow spheres) and two monovalent ions (K1 and K2, purple spheres) tightly coordinate the nucleotides involved in catalysis (sticks, color coded by atom type). The water molecule W1 (cyan sphere) is in an ideal position to perform a nucleophilic attack on the scissile phosphate (black arrows). Upon hydrolysis, the scissile phosphate swings out of the active site (semitransparent sticks and gray dotted arrow) to form an electrostatic interaction with K2 (gray dotted line). See also Figure S1.

Using the OI5eD1-5 construct, we solved the intron structure before and after 5' exon hydrolysis at 3.1 Å and 2.9 Å resolution, respectively. The prehydrolytic state (the stage prior to the first step of splicing) was crystallized in the presence of  $Ca^{2+}$  (Figure 1 and Table S1 available online), which is a known inhibitor of  $Mg^{2+}$ -dependent enzymes (including group II introns) and which has previously been employed to crystallize endonucleases in complex with their substrates (Erat and Sigel, 2008; Viadiu and Aggarwal, 1998; and this work, Figure 2). The posthydrolytic state was crystallized in the same condition, but with catalytically active  $Mg^{2+}$  ions that stimulate hydrolysis of the 5' exon (Figure S1). Overall, both structures are nearly identical to those determined previously (i.e., root-mean-square deviation [RMSD] values of 0.6 Å with respect to Protein Data Bank [PDB] ID code 3IGI), and their active sites adopt the characteristic triple helix conformation that is stabilized by a dehydrated metal ion of previously unknown identity, here classified as K1 (vide infra). In the precatalytic state, the metal ions M1 and M2 coordinate the pro-R oxygen atom of the scissile phosphate at the 5' splice junction (Figure 1), as predicted from chemical biology experiments (Padgett et al., 1994; Podar et al., 1995). Additionally, M1 coordinates the 3'-OH leaving group (belonging to the last nucleotide of the exon), whereas M2, together with C358 (catalytic triad), coordinates a solvent molecule located 2.7 Å from the scissile phosphate. This solvent molecule, validated by the calculation of the corresponding simulated-annealing electron density omit-map (Figure S1), is in the precise position that would be occupied by the reaction nucleophile, which consists either of a 2'-OH group when splicing proceeds through the branching pathway, or an  $H_2O$  in the hydrolytic splicing pathway that is typical for group IIC introns (Pyle, 2010). Finally, the geometry of the 5' splice junction is constrained by two other interactions. Upstream of the scissile phosphate, the 5' exon is immobilized by base complementarity to exon binding site 1 (EBS1), whereas downstream of the scissile phosphate, the 5' end of the intron is stabilized by a fourth important yet still uncharacterized metal ion, K2 (vide infra). As a consequence of these

interactions, the 5' splice junction adopts a sharp “kink” (Chan et al., 2012), with an unusually small backbone angle of approximately 50° at the scissile position (the backbone angle is defined here as the angle formed by three consecutive phosphorus atoms, Table S2). Upon hydrolysis, the kink relaxes and the scissile phosphate displaces by ~4 Å, where it is neutralized by electrostatic interactions with K2. By contrast, the 5' exon does not displace significantly, instead maintaining its coordination to M1 and thus occupying an ideal position to react as the nucleophile at the 3' splice junction during the second step of splicing.

In conclusion, the structures of the OI5eD1-5 constructs reveal the position of the key structural elements necessary for catalyzing the first step of splicing as it proceeds through the hydrolytic pathway.

### The Intron Structure in Its Ligand-Free State Explains Its High Reactivity as an Infectious Retroelement

In addition to structural characterization of 5' splice site hydrolysis, we also succeeded in solving the intron structure in a completely empty, exon-free state at 3.5 Å resolution. By crystallizing the OI1-5 construct in the absence of any added or residual oligonucleotides, which were present in all previous studies (Toor et al., 2010; Toor et al., 2008a; Toor et al., 2008b), we show that the free intron possesses a remarkably intact active site. The intron core adopts the typical triple helix conformation and maintains the positions of the four metal ions M1, M2, K1, and K2 (Figure S3). This ligand-free structure represents the intron product at the end of the splicing cycle after release of ligated exons. In this state, the intron can attack and retrotranspose into host genomes. Upon rebinding ligated exons, it can also catalyze spliced-exon reopening (SER), a reaction that provides a well-established enzymological mimic for the retrotransposition event (Mikheeva et al., 2000; Podar et al., 1995). The empty intron therefore provides a useful starting point for studying the infectious form of this ribozyme as it is poised to recognize substrates.

To visualize the free intron as it moves through a cycle of target binding and cleavage, we cocrystallized OI1-5 with

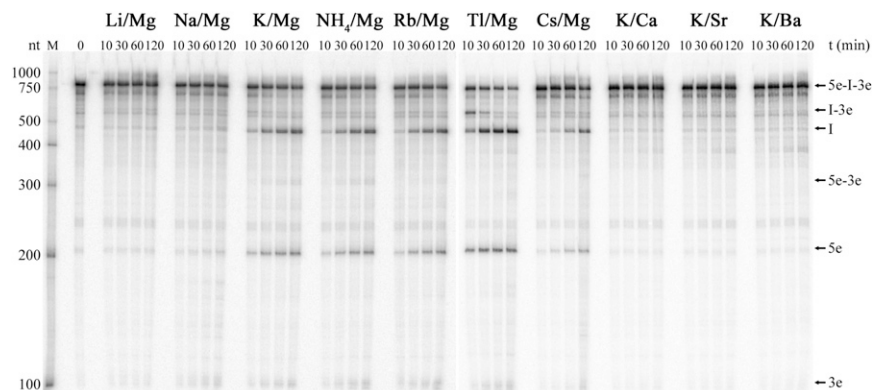

(5e-3e), and hydrolyzed 5' and 3' exons (5e and 3e, respectively). The sizes of the bands are indicated in nucleotides (nt) by the marker lane (M). The reactions were performed at a concentration of 10 mM divalent cation and 150 mM monovalent cation. See also Figure S2.

oligonucleotide substrates that are identical in sequence to native, ligated exons. We obtained two structures at 3.0 Å and 2.7 Å resolution in the presence of  $\text{Ca}^{2+}$  and  $\text{Mg}^{2+}$ , respectively, which describe target recognition both before and after hydrolysis. In the precatalytic state, the scissile phosphate of the substrate presents its pro-S oxygen atom to the two catalytic metals M1 and M2 (Figure 3). As in the 5' exon hydrolysis reaction, M1 coordinates the leaving group, whereas M2, together with C358, coordinates a solvent molecule that likely represents the reaction nucleophile (Figure S3). Upstream of the scissile position, the 5' end of the oligonucleotide tightly binds to the EBS1 site, and it does not displace upon hydrolysis. Downstream of the scissile phosphate, the 3' end of the oligonucleotide forms a well-defined Watson-Crick base pairing between the scissile uridine and the EBS3 adenosine (A223) in the precatalytic state, but this contact is released after hydrolysis. Constrained by the interactions with the exon binding sites, the junction of the ligated exons is relatively extended and forms a backbone angle of  $137^\circ$ .

In conclusion, the structures of the OiD1-5 construct with and without a target substrate reveal that the free intron is structurally intact, with a perfectly well-formed core that can readily bind target RNA or DNA molecules without undergoing extensive structural rearrangement.

### A Heteronuclear Metal Ion Center Is Required for Group II Intron Splicing Reactions

A consistent feature of the structures described above are the four metal ions (M1, M2, K1, and K2) involved in the reaction mechanism. Given their central importance for all the splicing reactions characterized thus far, it was essential to unambiguously establish the identity, location, and functional role of these ion cofactors. To this end, we selectively replaced each putative type of ion with alkaline and alkali-earth metals, monitoring the effects of the substitutions crystallographically, by using X-ray anomalous scattering, and biochemically, through splicing assays.

Previous crystallographic investigations that used the heavy ion  $\text{Yb}^{3+}$  established that M1 and M2 correspond to multivalent ion binding sites (Toor et al., 2008a), and here we confirmed

### Figure 2. Splicing Reactions in the Presence of Different Ion Analogues

Splicing is robust in all ion combinations that support the structural integrity of the triple helical, active intron conformation ( $\text{K}^+/\text{Mg}^{2+}$ ,  $\text{Rb}^+/\text{Mg}^{2+}$ ,  $\text{Tl}^+/\text{Mg}^{2+}$ , and  $\text{NH}_4^+/\text{Mg}^{2+}$ ). By contrast, splicing is impaired in  $\text{Cs}^+/\text{Mg}^{2+}$ , likely due to the larger size of  $\text{Cs}^+$  and to its consequently suboptimal occupation at the K1 site.  $\text{Mg}^{2+}$  analogs (i.e.,  $\text{Ca}^{2+}$ ,  $\text{Sr}^{2+}$ , and  $\text{Ba}^{2+}$ ) completely inhibit splicing despite ensuring the overall correct assembly of the intron. Finally,  $\text{Na}^+$  and  $\text{Li}^+$  also do not promote catalysis because they favor the toggled intron conformation (see Figure 4). Upon splicing, the precursor RNA (5e-1-3e) forms intermediate product (1-3e), linear intron (1), ligated exons

this by using  $\text{Ca}^{2+}$  (3.3 Å resolution) and  $\text{Ba}^{2+}$  (4.0 Å resolution, Figure S2). The M1 and M2 sites are also fully occupied in the structures obtained by using  $\text{Mg}^{2+}$  as the only multivalent cation, and they possess the octahedral coordination geometry typical of  $\text{Mg}^{2+}$  (Andreini et al., 2008). It is therefore likely that M1 and M2 are occupied by  $\text{Mg}^{2+}$  under physiological conditions. Based on their location relative to the scissile linkage and on the biochemically-established role of their coordinating ligands (Boulanger et al., 1995; Schmidt et al., 1996), it is also likely that M1 and M2 participate directly in the mechanism of chemical catalysis. Not surprisingly, substituting  $\text{Mg}^{2+}$  with divalent ion analogs  $\text{Ca}^{2+}$ ,  $\text{Sr}^{2+}$ , and  $\text{Ba}^{2+}$  inhibits splicing almost completely (Figure 2). Such inhibitory effect can be ascribed to the fact that these ions do not allow the correct formation of the trigonal bipyramidal reaction intermediate that is typical of the  $\text{S}_{\text{N}}2$  nucleophilic reaction performed by the intron, as observed in other systems (McConnell et al., 1997; Viadiu and Aggarwal, 1998).

By contrast, although previous structures revealed electron density peaks at the positions that we define as K1 and K2 (Toor et al., 2010; Toor et al., 2008b), the identity of the species occupying these sites and their precise location were ambiguous and required conclusive characterization. To characterize the K1 and K2 sites, we solved the structure of OiD1-5 in the presence of heavy monovalent ions  $\text{Tl}^+$  (2.8 Å resolution),  $\text{Rb}^+$  (3.3 Å resolution) and  $\text{Cs}^+$  (3.4 Å resolution). All anomalous difference Fourier electron density maps show two pronounced peaks within the intron core at the K1 and K2 positions (and not at the M1 and M2 positions, Figure S2). All structures are intact overall, but  $\text{Cs}^+$ , which is the largest ion (Table S3), induces a distortion in the active site. Additionally, we solved the structure of OiD1-5 in the presence of  $\text{NH}_4^+$  (2.9 Å resolution), which possesses an ionic radius similar to  $\text{K}^+$ , and in  $\text{Na}^+$  (3.2 Å resolution), which has a smaller radius (Table S3). It is significant that  $\text{NH}_4^+$ , but not  $\text{Na}^+$  (vide infra), can bind at the K1 and K2 positions. Therefore, we conclude that K1 and K2 are specific monovalent ion binding sites with strict size requirements for proper occupancy, and it is likely that they are occupied by  $\text{K}^+$  under physiological conditions. It is significant that the M1, M2, and K1 ions are each joined by a single shared ligand atom (the pro-R oxygen of the scissile phosphate in the 5' splice junction



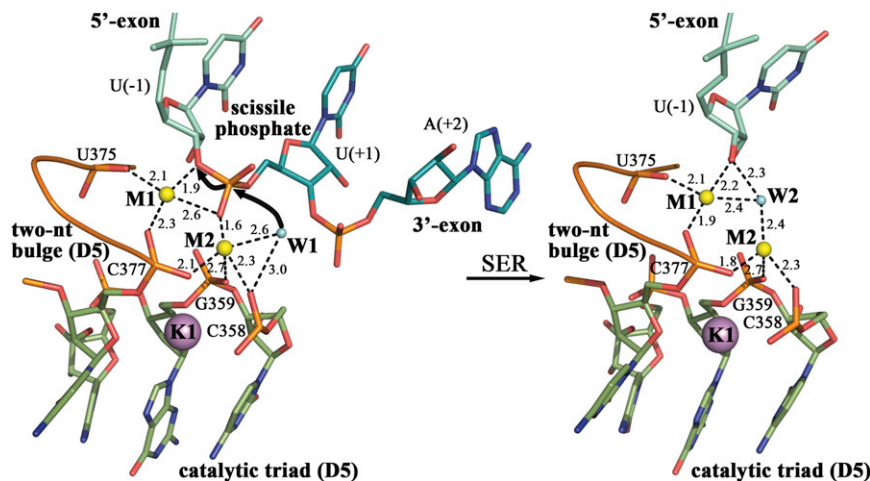

**Figure 3. The Mechanism of the Spliced-Exon-Reopening Reaction**

Left: structure of OiD1-5 bound to a ligated oligonucleotide in the presence of  $K^+/Ca^{2+}$ . The scissile phosphate is coordinated by the M1 and M2 ions ( $Ca^{2+}$ , yellow spheres), whereas the reaction nucleophile (W1, cyan sphere) is coordinated by M2 and C358, similar to the 5' exon hydrolysis reaction (Figure 1). Right: structure of OiD1-5 bound to a hydrolyzed oligonucleotide in the presence of  $K^+/Mg^{2+}$ . Upon hydrolysis, the portion of the oligonucleotide downstream of the scissile site is released, whereas the portion upstream of the scissile site remains bound to the intron because of its extensive base complementarity with EBS1 (not shown). In the absence of the scissile phosphate, a water molecule (W2, cyan sphere) bridges M1 and M2. See also Figure S3.

and the pro-S oxygen of C377, respectively). Given this bonding pattern, these metals can be formally classified as a heteronuclear  $KMgO$  cluster (Cotton and Wilkinson, 1980), resembling the clusters observed in metalloproteins (Messerschmidt et al., 2001). However, a metal cluster composed of magnesium and potassium ions has not been reported to date, and it may represent a unique attribute of RNA enzymes. This trinuclear M1-M2-K1 cluster, together with the ion K2, forms a four-metal center that constitutes an essential cofactor for group II intron catalysis.

Complementary functional analysis confirms this hypothesis. Specifically, we examined the effects of different monovalent and divalent cations on the splicing activity of wild-type *O.i.* group II intron. We observed that all ion combinations that produced well-diffracting crystals with well-formed active sites ( $K^+/Mg^{2+}$ ,  $NH_4^+/Mg^{2+}$ ,  $Rb^+/Mg^{2+}$ , and  $Tl^+/Mg^{2+}$ ) also displayed robust splicing (Figure 2). By contrast, splicing is inhibited in the presence of  $Cs^+$  and blocked in  $Na^+$ , two ions that preserve the overall structure of the ribozyme yet distort the local active-site architecture. Thus, enzyme activity perfectly mirrors the results from crystallography.

Taken together, the collection of structures and accompanying biochemistry demonstrate that M1, M2, K1, and K2 form a functional metal center in which each type of ion plays a role in catalysis. It is likely that additional ions also contribute indirectly to activity through their role in supporting the intron structure. Indeed, our collection of high-resolution X-ray anomalous scattering maps obtained for  $Tl^+$ ,  $Rb^+$ ,  $Cs^+$ , and  $Ba^{2+}$  now reveal the identity of site-bound divalent and monovalent metals throughout the entire OiD1-5 structure (three of which are described in Figure S2), thus providing much-needed information on the role of metals in the architectural fabric of RNA.

### The Intron Active Site Can Adopt Two Alternative Conformations

As reported above, when  $K^+$  is replaced by  $Na^+$  in the crystallization buffer, the K1 and K2 sites are not occupied and this structural feature induces a loss of electron density at the M1 and M2 sites. Such disruption of the active site is accompanied by the

dislocation of the J2/3 junction and D5 bulge residues G288 and C377, which become stabilized by a completely different network of interactions (Figure 4). In the  $Na^+$  structure, G288 has rotated by about  $90^\circ$  around an axis connecting its C5' and C3' backbone atoms, and the guanosine moiety is now located directly underneath A287, extending a stack of nucleobases that is formed by G3, U4, G5, A376, and A287. Additionally, G288 forms two new sets of hydrogen bonds, one with C377 through its O2' atom and the other with a solvent molecule that is coordinated by A287 and the N2 of G321 (Figure S4). As a consequence of the conformational change in G288, C377 also rotates by about  $70^\circ$  around the glycosidic bond. In this new position, N3 and O2' of C377 form hydrogen bonds with O2' of G288 and with the pro-R phosphate oxygen of C360, respectively. In this conformation, G288 and the base moiety of C377 possess higher B-factors than the rest of the ribozyme chain ( $B_{ave-overall} = 72 \text{ \AA}^2$ ,  $B_{ave-G288} = 133 \text{ \AA}^2$ ,  $B_{ave-C377-base} = 110 \text{ \AA}^2$ ) indicating a higher degree of flexibility for these residues. Perhaps most importantly, upon rotation of G288 and C377, binding of the metal cluster in the active site is abolished, which explains why only 2%–5% of wild-type splicing activity is retained under these conditions (Figure S5) and which suggests that the alternative conformation represents an inactive state of the intron.

We observed a similar disruption of the active site in the structure of Oi5eD1-5 solved in the presence of  $Li^+$  (2.8 Å resolution). Although  $Li^+$  does not appear to support splicing (Figure 2), the  $Li^+$  structure reveals a posthydrolytic state in which the 5' exon has been cleaved over the course of the crystallization experiment. This observation suggests that the active triple helix conformation may form, at least transiently, in  $Li^+$  conditions. Indeed, electron density within the active site is compatible with a double conformation for G288 (Figure S4).

Overall, the  $Na^+$  and  $Li^+$  structures show that the active site of group II introns can exist in two different states: the active triple helical form and the inactive toggled conformation. The presence of residual hydrolytic activity and the high crystallographic B-factors of G288 and C377 suggest that there exists a reversible equilibrium between these two conformations in the core.

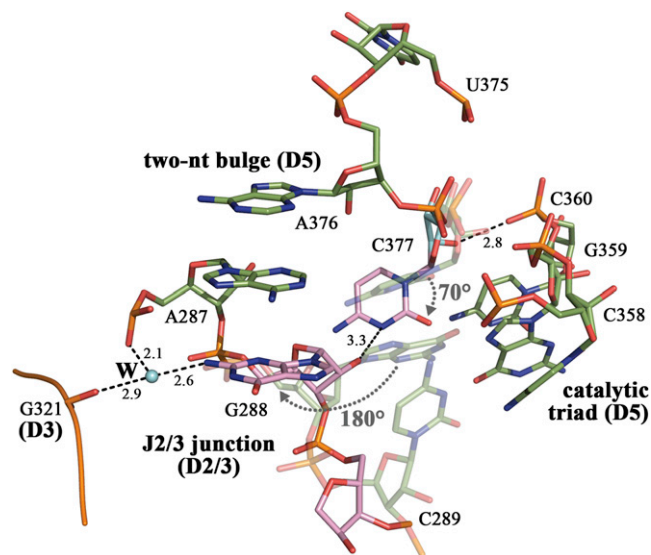

**Figure 4. The Toggled Conformation of the J2/3 Junction**

The structure of the OiD1-5 ribozyme solved in the presence of  $\text{Na}^+/\text{Mg}^{2+}$  at 3.2 Å resolution shows a concerted rotation (gray dotted arrows) of G288 and C377 from the triple helix conformation (semitransparent sticks, drawn by using the coordinates of the  $\text{K}^+/\text{Mg}^{2+}$  structure) to the toggled conformation (pink solid sticks). The toggled conformation is stabilized by a new network of hydrogen bonds (black dotted lines, distances in angstroms), which involves also a solvent molecule (W) and G321 in domain 3. See also Figure S4.

### A Mutation in the Triple Helix Affects the First and Second Steps of Splicing at Different Rates

In order to evaluate whether the toggled conformation is functionally relevant, we used the  $\text{Na}^+$  structure to guide the creation of point mutants that would affect the hydrogen bonding networks among the active residues. Specifically, we analyzed the splicing behavior of point mutations at positions G288 and C377, which appear to stabilize the toggled conformation. Based on energy-minimized structural models of such mutations, we expected the G288N mutants to destabilize both the triple helix and the toggled conformations, and the C377N mutants to form different sets of interactions in the two conformations and thus to influence the respective stability of the conformers to different extents. In particular, C377G is likely to have a stabilizing effect on the toggled conformation, in which it can establish an additional hydrogen bond with the N7 atom of G359 (Figure S5). Therefore, we anticipated that mutations on C377 should reveal if and when the toggled conformation forms during splicing.

In line with these expectations, we observed that G288 mutations have a strong impact on both steps of splicing (>90% inhibition), whereas substitutions of C377 affect the two steps differently (Table S4). Most importantly, in the presence of physiological  $\text{K}^+$  concentrations, the C377G mutant accumulates linear intron/3' exon intermediate, indicating that it suffers a pronounced defect in the transition to the second step of splicing (40-fold slower second step relative to wild-type, Figure 5).

Therefore, the behavior of the C377G mutant reveals a differential influence of active-site elements on the two splicing steps,

suggesting that the network of interactions within the intron active-site changes during the splicing reaction. It is possible that such rearrangement involves the transient disruption of the triple helix conformation to adopt the toggled conformation described above for the  $\text{Na}^+$  and  $\text{Li}^+$  structures.

## DISCUSSION

### Visualizing the Splicing Chemistry of a Complex Metal Ion Center

This work provides the spatial description of the structural elements necessary for group II intron catalysis and describes how these elements change position during a cycle of splicing. We visualize the mechanistic interplay of conserved RNA intron motifs, a four-metal-ion heteronuclear center, the scissile phosphate, and the reaction nucleophile.

First, we establish that three conserved ribozyme motifs (D5 catalytic triad, D5 bulge, and J2/3 nucleotides) provide the necessary scaffold for correct formation of the active site and tight binding of the catalytic metal center. Bound oligonucleotide substrate is not required for the integrity of active-site architecture, as demonstrated by the fact that conserved motifs maintain their position, and catalytic metals fully occupy their respective binding sites in all ligand-free structures (Figure S3). This observation is unusual in the context of phosphodiester cleavage enzymes (including protein enzymes), which generally require the binding of an oligonucleotide substrate in order to fix the position of catalytic metal ions (Pingoud et al., 2009). The fact that the group IIC ribozymes have rigid “teeth” is consistent with their biological function, as the free introns are highly reactive, infectious retroelements that attack and integrate throughout host genomes, where they must function with complete autonomy. Having a preorganized active site composed of a rigid metal cluster is a distinct advantage for a genomic predator.

Second, we find that each metal within the heteronuclear center contributes to catalysis, acting as an essential cofactor. The divalent ions M1 and M2 directly activate the reactants for catalysis, as described for other two-metal-ion-dependent enzymes (Steitz and Steitz, 1993). But this enzyme is different in that monovalent ions are strictly required as well. K1 and K2 mold the RNA backbone within the conserved core, rigidifying the divalent ion binding sites and stabilizing key reaction intermediates. The exceptionally dehydrated K1 ion acts like a “piston” that anchors the M1 and M2 ligands firmly in place, potentially explaining the stability of these latter sites in the absence of bound oligonucleotide. As such, it is also likely that K1 modulates conformational toggling between the first and the second splicing steps (vide infra). By contrast, K2 plays a dual role both by ensuring correct arrangement of the 5' splice junction and by stabilizing the postcatalytic state after the first step of splicing. These findings underscore the importance of  $\text{K}^+$  ions during RNA tertiary structure formation, as observed also in riboswitches (Lambert et al., 2009) and in rRNA fragments (Conn et al., 2002). In a broader perspective, our results show that, by forming complex catalytic metal centers, RNA can be expected to possess the same complex chemistry as proteins. However, we see differences in the bioinorganic chemistry of

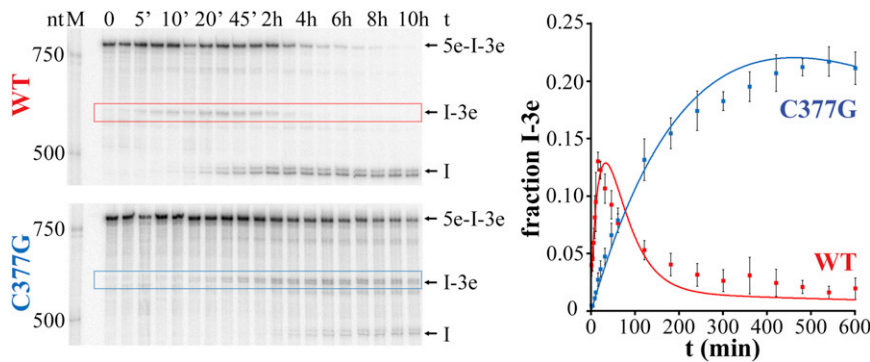

**Figure 5. Effect of the C377G Mutation on Group II Intron Splicing**

Wild-type *O.i.* group II intron splices efficiently under physiological  $K^+$  concentrations, whereas the C377G mutant has an evident splicing defect and accumulates intermediate product (I-3e, red and blue boxes, respectively). Specifically, the rate constants of the C377G mutant are reduced by  $\sim 11$ -fold in the first step and by  $\sim 37$ -fold in the second step of splicing with respect to wild-type, respectively (Table S4). The graph on the right shows the evolution of the population of intermediate over time. The error bars represent the standard deviation calculated from three independent experiments. Intermediate (I3e) and linear intron (I) migrate as double bands because of cryptic cleavage at nucleotides (-11) and (-10) from the 5' end of the intron, as explained in Extended Experimental Procedures. See also Figure S5.

the two systems: monovalent ions appear to play a central role in the chemistry of RNA splicing, whereas protein metalloenzymes are almost exclusively dependent on multivalent ions and on transition elements in particular (Messerschmidt et al., 2001).

Third, the structural comparison of the 5' exon hydrolysis and SER reactions provide important information on the geometry of the scissile phosphate and on the reaction nucleophile. On one hand, the structures reveal specific differences between the two reactions. For instance, the stereochemistry of the scissile phosphate is inverted in the two steps (pro-R for 5' exon hydrolysis and pro-S for SER) as predicted by biochemical experiments (Padgett et al., 1994; Podar et al., 1995, 1998). In addition, the RNA backbone adopts a different conformation at the scissile position during the two steps. It is tightly kinked before 5' exon hydrolysis but extended prior to SER, suggesting that, although it may favor the reaction (Chan et al., 2012), a kink at the scissile junction is not necessarily required for hydrolysis. However, the two reactions also display common features. Most importantly, they occur at the same active site, sharing even the structural position of the reaction nucleophile. In light of the debate over whether group II introns possess one single or two separate active sites (de Lencastre et al., 2005; Pyle and Lambowitz, 2006), our structural observations are enlightening. Considering that 5' exon hydrolysis is a pathway by which introns catalyze the first step of splicing, whereas SER represents the reverse of the second step of splicing, our data are consistent with the single active-site hypothesis. This conclusion is supported by the fact that the 5' exon maintains its coordination to EBS1 and to catalytic ion M1 during both splicing reactions, both in the precatalytic states and after hydrolysis.

In summary, considering the structural organization of the active-site elements, we conclude that group II introns possess a significantly different active site from that of group I introns (Cate et al., 1997). Rather, group II introns resemble protein enzymes, like type II endonuclease BamHI (Figure 6; Viadiu and Aggarwal, 1998). The striking similarity between these macromolecules represents an intriguing example of convergent evolution and underscores the fact that catalytic strategy is universal and independent of biopolymer scaffold.

### Toggleing of the J2/3 Junction Guides the Transition between the First and Second Steps of Splicing

Although the active-site elements described above maintain a similar structural organization during all of the states that contribute to splicing chemistry, the intron must undergo some conformational rearrangement between the first and the second steps of splicing in order to accommodate the entry and exit of splicing components. The observation of an alternative conformational state sampled by G288 and C377 may help resolve this apparent paradox. G288 and C377 have historically been implicated in transition between the first and second steps of splicing (Boudvillain and Pyle, 1998; de Lencastre et al., 2005; Ho Faix, 1998; Mikheeva et al., 2000), so it is remarkable that these particular nucleotides here emerge as the major structural players involved in core conformational change.

Nucleotide G288 is strictly conserved among all group II introns and is required for both the first and the second splicing steps (de Lencastre and Pyle, 2008; Jacquier and Michel, 1990; Mikheeva et al., 2000), as we confirm in this work (Table S4). In some introns, the G288N mutants were shown to suffer a more serious second step than first step splicing defect, thereby leading to the suggestion that G288 may be a dynamic element that contributes to intron rearrangement between the two steps (Ho Faix, 1998; Mikheeva et al., 2000; and this work, Table S4). The observation that G288 enhances reactivity in constructs where it is attached to D2 but disconnected from D3 (Fedorova et al., 2003) also supports the hypothesis that conformational flexibility of G288 contributes to splicing.

By contrast, C377 is only moderately conserved, and one observes that C377 can be phylogenetically substituted by U and (in one case) by A, but it is never replaced by G in any known sequence (Keating et al., 2010). Here we report that the C377G mutant displays a pronounced defect that specifically obstructs the second step of splicing (Table S4). This defect cannot be attributed strictly to a disruption of the catalytic triple helix because we have solved the structure of the C377G mutant at 3.2 Å resolution in the presence of  $K^+$ , and we show that it is capable of forming the chemically competent active-site form (Figure S5). However, the structural and functional data



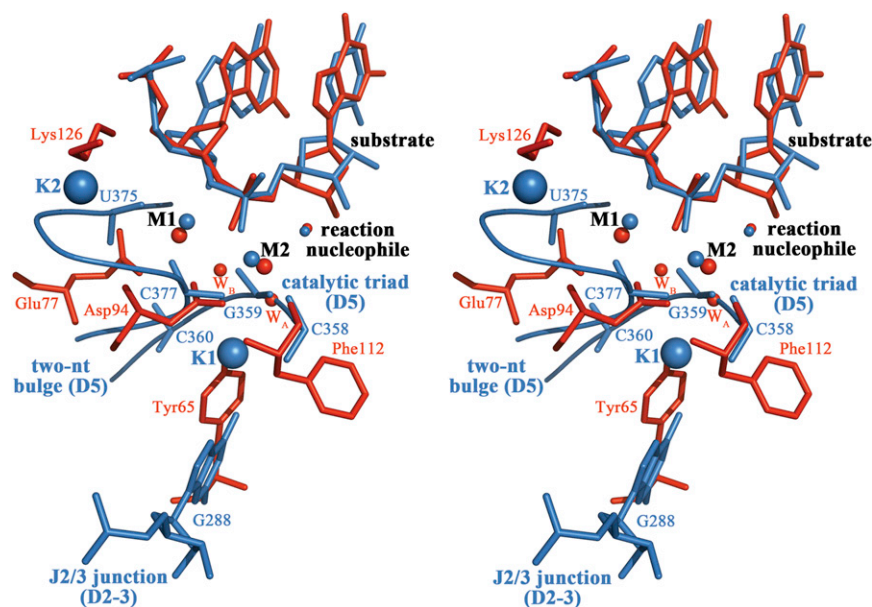

**Figure 6. Structural Convergence between Group II Introns and Protein Endonucleases**

Stereo representation of the intron active site ( $K^+/Ca^{2+}$  oligonucleotide-bound structure, blue) superimposed over the R active site of endonuclease BamHI (PDB ID code: 2BAM, red). The carboxyl groups of amino acids Glu77 and Asp94 occupy the same location as the phosphates of nucleotides U375 and C377 (D5 bulge); the carbonyl oxygen of Phe112 and other solvent molecules ( $W_A$  and  $W_B$ ) replace the phosphates of C358-G359 (D5 catalytic triad), Lys126 is analogous to the K2 ion, and Tyr65 plays the same role as the K1 ion. As a consequence, the catalytic ions M1 and M2 and also the reaction nucleophile superimpose precisely.

demonstrate that C377 can establish at least two different interaction networks during the cycle of splicing, of which the triple helix conformation represents only one set. Based on the effects of the mutants, the wealth of past functional data, and the conformational isomerization we have observed crystallographically, we propose that G288 and C377 are flexible and that the triple helix is disrupted during the transition between the first and second steps of splicing. Possibly, the toggled conformation adopted by the intron during this rearrangement resembles that which we observe upon crystallization of the intron in  $Na^+$  or  $Li^+$ .

In addition to the mutagenesis data, two other pieces of evidence suggest that the triple helix is disrupted during the splicing cycle. First, in our structures (which lack D6) we observe that the first intron nucleotide, G1, rotates and occupies the active site at the conclusion of the 5' exon hydrolysis reaction (Figure S1). During splicing, such rotation would create a steric impediment for the 3' splice junction to insert into the same position. It is known that an interaction between G1 and the penultimate intron nucleotide is important for the second splicing step (Chanfreau and Jacquier, 1993). The formation of this tertiary interaction, together with the transient disruption of the active site, may favor the displacement of G1. Second, D6 is expected to occupy a cavity near the J2/3 junction. D6 was proposed to adopt an "active" conformation in the first step of splicing and a "silent" conformation forming the  $\eta$ - $\eta'$  interaction with D2 for the second step of splicing (Pyle, 2010). Modeling shows that the "silent" conformation is likely to involve hydrogen bonds between the branch site and G288 but only when the latter adopts the toggled conformation, as in the  $Na^+$  and  $Li^+$  structures (Figure S4). Interestingly, G288 was indeed shown to form short-range crosslinks near the branch site in  $\alpha 5\gamma$  group II intron (de Lencastre et al., 2005). Therefore, the disruption of the triple helix may help orient D6 correctly within  $\eta$ - $\eta'$ , facilitating the second step of splicing.

### A Complete Model for the Splicing Reaction and Its Applicability to the Spliceosome

Based on the results of our structural and functional studies, we propose a model for the splicing reaction, which consists

of three successive steps (Figure 7). In the precatalytic state, the group II intron adopts the triple helix conformation and catalyzes 5' exon hydrolysis. Upon hydrolysis, the triple helix is broken by concerted rotation of G288 and C377 and the metal center within the active site is transiently disrupted to favor the release of G1 and the recruitment of the 3' splice junction. After this rearrangement, the intron undergoes the second splicing step. It is possible that the combination of the 3' splice junction with the toggled conformation of G288 may create a novel metal binding site for M2 that catalyzes 3' exon excision. In this case, the geometry of the active site could potentially resemble RNA polymerase, which possesses a similar arrangement of active-site elements, except for the location of M2 (Wang et al., 2006). That said, the same triple-helical active-site is observed in group II intron crystal structures that model both steps of splicing (5' exon hydrolysis and SER reactions), as discussed above. Therefore, it seems more likely that G288 toggles back into the active site after the second-step reactants are brought into place, re-establishing the triple helix and the heteronuclear metal cluster prior to the second chemical step. Such toggling of G288 would explain how the intron can rearrange between the splicing steps despite possessing one single active site (Pyle and Lambowitz, 2006). This hypothesis implies the formation of a transient diffusive intermediate between the splicing steps, in which the active-site metals bind diffusively to the toggled conformation of the intron—and are thus invisible in the crystal structure.

The idea of a rearrangement involving the J2/3 junction and of the formation of a transiently inactive intermediate is not only in agreement with structural and biochemical work on group II introns (Ho Faix, 1998 and this article), but it is strongly supported by data obtained on the analogous eukaryotic splicing machinery, the spliceosome. In the spliceosome, the snRNA subunit U6 possesses a conserved ACAGAGA box in which the last G (G52 in yeast) is likely to correspond with intron





## CONCLUSION

In conclusion, we present a series of X-ray structures of the *O.i.* group II intron that provide essential mechanistic details about the complete splicing reaction. On one hand, they show the intron “in action,” and they clarify the mechanism of hydrolytic splicing and the structural basis for retrotransposition. Additionally, they reveal that the intron active site can adopt two alternative conformations and that toggling between them may regulate the transition from the first to the second step of splicing. Our results suggest a model for splicing with direct implications for the human spliceosome, which is expected to follow a reaction mechanism similar to group II introns. Therefore, our data provide a framework for the design of future experiments aimed at determining the structure of intron domain 6 and of the spliceosomal active site, which are urgently needed to complete our understanding of splicing and pre-mRNA maturation processes.

## EXPERIMENTAL PROCEDURES

### Cloning and Mutagenesis

The constructs of *Oceanobacillus iheyensis* group II intron used in this work correspond to previously used constructs (Toor et al., 2008a), modified as described in Extended Experimental Procedures.

### In Vitro Transcription, Purification, and Splicing Assays

Following restriction with the appropriate endonucleases at 37°C overnight, the intron was transcribed in vitro by using T7 polymerase as previously described (Toor et al., 2008a). For crystallization purposes, it was then purified in a native state as previously described (Toor et al., 2008a), omitting the splicing step. Intron RNA was then rebuffed and concentrated to 80 μM in buffer A (10 mM MgCl<sub>2</sub> and 5 mM sodium cacodylate [pH 6.5]). For the splicing studies, the intron was radiolabeled during transcription, purified in a denatured state as previously described (Toor et al., 2008a) and subsequently refolded. Splicing assays were performed at 37°C and in 5 mM MgCl<sub>2</sub> if not mentioned otherwise, as described in Extended Experimental Procedures.

### Crystallization

Crystals of the purified intron mixed with a 0.5 mM spermine solution in buffer A, and with the crystallization buffer in a 1:1:1 volume ratio (Toor et al., 2008a), were grown at 30°C by the hanging drop vapor diffusion method. Where appropriate, a 1 mM oligonucleotide solution was mixed with all other components in a 1:1:1:1 volume ratio. All crystallization solutions are described in the Extended Experimental Procedures.

### Structure Determination

Diffraction data (summarized in Table S1) were collected at beamlines 24ID-C and E (NE-CAT) at the Argonne Photon Source (APS), Argonne, IL, and processed with the Rapid Automated Processing of Data (RAPD) software package (<https://rapd.nec.aps.anl.gov/rapd/>) and with the XDS suite (Kabsch, 1993). The structures were solved by molecular replacement using Phaser (CCP4, [Collaborative Computational Project Number 4, 1994]) and the RNA coordinates of Protein Data Bank (PDB) entry 3IGI (without solvent atoms and bound oligonucleotide) as the initial model (Toor et al., 2010). The models were improved automatically in Phenix (Adams et al., 2010) and Refmac5 with TLS (Collaborative Computational Project Number 4, 1994; Murshudov et al., 1997), manually in Coot (Emsley and Cowtan, 2004), and finally evaluated by MolProbity (Chen et al., 2010; Davis et al., 2007). Anomalous difference Fourier electron density maps were calculated by using the programs Sfall and FFT in CCP4 (Agarwal, 1978; Ten Eyck, 1973). Omit maps were calculated in Phenix, excluding the atoms of interest, and avoiding model bias by simulated annealing refinement. The figures depicting the structures were drawn with PyMOL Molecular Graphics System (Version 1.5.0.4 Schrödinger).

## ACCESSION NUMBERS

The Protein Data Bank accession numbers for the structure factors reported in this paper are 4E8K, 4E8M, 4E8N, 4E8P, 4E8Q, 4E8R, 4E8T, 4E8V, 4FAQ, 4FAR, 4FAU, 4FAW, 4FAX, and 4FB0.

## SUPPLEMENTAL INFORMATION

Supplemental Information includes Extended Experimental Procedures, six figures, and four tables and can be found with this article online at <http://dx.doi.org/10.1016/j.cell.2012.09.033>.

## ACKNOWLEDGMENTS

We thank the beamline scientists at 24-ID-C and E, NE-CAT, APS, Argonne (IL), USA for their thorough support during data collection. We acknowledge all members of the Pyle lab, and in particular Dr. Olga Fedorova for synthesizing the oligonucleotide fragment, Dr. Maximilian Bailor for cloning the Oid1-5 construct, Gabriele Drews for cloning the Oi5eD1-5 construct, Dr. Kevin Keating for the analysis of the backbone kink at the 5' splice junction (Table S2), Dr. Srinivas Somarowthu for calculating the model of intron domain 6 in the silent conformation (Figure S4), Dr. Laura Murray for sharing preliminary unpublished results, Dr. Dahai Luo and Dr. Patrick Lombardi for valuable discussion, and Dr. Isabel Chillón Gázquez for constructive criticism and help preparing the figures. Additionally, we acknowledge Dr. John Abelson, Dr. John Stahley, Dr. Magda Konarska, Dr. Patrick Cramer, Dr. Giovanni Capranico, Dr. Ulrich Ermler, and Tanja Hedderich for insightful discussion. This project was supported by the National Institute of Health (RO1GM50313). Prof. Pyle is a Howard Hughes Medical Institute Investigator.

Received: May 22, 2012

Revised: July 13, 2012

Accepted: September 6, 2012

Published: October 25, 2012

## REFERENCES

- Adams, P.D., Afonine, P.V., Bunkóczi, G., Chen, V.B., Davis, I.W., Echols, N., Headd, J.J., Hung, L.W., Kapral, G.J., Grosse-Kunstleve, R.W., et al. (2010). PHENIX: a comprehensive Python-based system for macromolecular structure solution. *Acta Crystallogr. D Biol. Crystallogr.* 66, 213–221.
- Agarwal, R.C. (1978). A new least-squares refinement technique based on the fast Fourier transform algorithm. *Acta Crystallogr. A* 34, 791–809.
- Andreini, C., Bertini, I., Cavallaro, G., Holliday, G.L., and Thornton, J.M. (2008). Metal ions in biological catalysis: from enzyme databases to general principles. *J. Biol. Inorg. Chem.* 13, 1205–1218.
- Boudvillain, M., and Pyle, A.M. (1998). Defining functional groups, core structural features and inter-domain tertiary contacts essential for group II intron self-splicing: a NAIM analysis. *EMBO J.* 17, 7091–7104.
- Boulanger, S.C., Belcher, S.M., Schmidt, U., Dib-Hajj, S.D., Schmidt, T., and Perlman, P.S. (1995). Studies of point mutants define three essential paired nucleotides in the domain 5 substructure of a group II intron. *Mol. Cell. Biol.* 15, 4479–4488.
- Brow, D.A. (2002). Allosteric cascade of spliceosome activation. *Annu. Rev. Genet.* 36, 333–360.
- Burke, J.E., Sashital, D.G., Zuo, X., Wang, Y.X., and Butcher, S.E. (2012). Structure of the yeast U2/U6 snRNA complex. *RNA* 18, 673–683.
- Cate, J.H., Hanna, R.L., and Doudna, J.A. (1997). A magnesium ion core at the heart of a ribozyme domain. *Nat. Struct. Biol.* 4, 553–558.
- Chan, R.T., Robart, A.R., Rajashankar, K.R., Pyle, A.M., and Toor, N. (2012). Crystal structure of a group II intron in the pre-catalytic state. *Nat. Struct. Mol. Biol.* 19, 555–557.
- Chanfreau, G., and Jacquier, A. (1993). Interaction of intronic boundaries is required for the second splicing step efficiency of a group II intron. *EMBO J.* 12, 5173–5180.

- Chen, V.B., Arendall, W.B., 3rd, Headd, J.J., Keedy, D.A., Immormino, R.M., Kapral, G.J., Murray, L.W., Richardson, J.S., and Richardson, D.C. (2010). MolProbity: all-atom structure validation for macromolecular crystallography. *Acta Crystallogr. D Biol. Crystallogr.* **66**, 12–21.
- Collaborative Computational Project Number 4. (1994). The CCP4 suite: programs for protein crystallography. *Acta Crystallogr. D Biol. Crystallogr.* **50**, 760–763.
- Conn, G.L., Gittis, A.G., Lattman, E.E., Misra, V.K., and Draper, D.E. (2002). A compact RNA tertiary structure contains a buried backbone-K<sup>+</sup> complex. *J. Mol. Biol.* **318**, 963–973.
- Cotton, A.F., and Wilkinson, G. (1980). Symmetry and Structure. In *Advanced organic chemistry. A comprehensive text* (New York, USA: John Wiley and Sons, Inc.), pp. 58–59.
- Dai, L., and Zimmerly, S. (2002). The dispersal of five group II introns among natural populations of *Escherichia coli*. *RNA* **8**, 1294–1307.
- Davis, I.W., Leaver-Fay, A., Chen, V.B., Block, J.N., Kapral, G.J., Wang, X., Murray, L.W., Arendall, W.B., 3rd, Snoeyink, J., Richardson, J.S., and Richardson, D.C. (2007). MolProbity: all-atom contacts and structure validation for proteins and nucleic acids. *Nucleic Acids Res.* **35**(Web Server issue), W375–W383.
- de Lencastre, A., and Pyle, A.M. (2008). Three essential and conserved regions of the group II intron are proximal to the 5′-splice site. *RNA* **14**, 11–24.
- de Lencastre, A., Hamill, S., and Pyle, A.M. (2005). A single active-site region for a group II intron. *Nat. Struct. Mol. Biol.* **12**, 626–627.
- Emsley, P., and Cowtan, K. (2004). Coot: model-building tools for molecular graphics. *Acta Crystallogr. D Biol. Crystallogr.* **60**, 2126–2132.
- Erat, M.C., and Sigel, R.K. (2008). Divalent metal ions tune the self-splicing reaction of the yeast mitochondrial group II intron *Sc.ai5γ*. *J. Biol. Inorg. Chem.* **13**, 1025–1036.
- Fabrizio, P., and Abelson, J. (1990). Two domains of yeast U6 small nuclear RNA required for both steps of nuclear precursor messenger RNA splicing. *Science* **250**, 404–409.
- Fedorova, O., Mitros, T., and Pyle, A.M. (2003). Domains 2 and 3 interact to form critical elements of the group II intron active site. *J. Mol. Biol.* **330**, 197–209.
- García-Rodríguez, F.M., Barrientos-Durán, A., Díaz-Prado, V., Fernández-López, M., and Toro, N. (2011). Use of Rmlnt1, a group IIB intron lacking the intron-encoded protein endonuclease domain, in gene targeting. *Appl. Environ. Microbiol.* **77**, 854–861.
- Gordon, P.M., and Piccirilli, J.A. (2001). Metal ion coordination by the AGC triad in domain 5 contributes to group II intron catalysis. *Nat. Struct. Biol.* **8**, 893–898.
- Hardy, S.F., Grabowski, P.J., Padgett, R.A., and Sharp, P.A. (1984). Cofactor requirements of splicing of purified messenger RNA precursors. *Nature* **308**, 375–377.
- Ho Faix, P. (1998). Conserved nucleotides in the joining segment between domains 2 and 3 are important for group II intron splicing. (University of Pittsburgh, Pittsburgh), PhD thesis.
- Jacquier, A., and Michel, F. (1990). Base-pairing interactions involving the 5′ and 3′-terminal nucleotides of group II self-splicing introns. *J. Mol. Biol.* **213**, 437–447.
- Kabsch, W. (1993). Automatic processing of rotation diffraction data from crystals of initially unknown symmetry and cell constants. *J. Appl. Crystallogr.* **26**, 795–800.
- Keating, K.S., and Pyle, A.M. (2010). Semiautomated model building for RNA crystallography using a directed rotameric approach. *Proc. Natl. Acad. Sci. USA* **107**, 8177–8182.
- Keating, K.S., Toor, N., Perlman, P.S., and Pyle, A.M. (2010). A structural analysis of the group II intron active site and implications for the spliceosome. *RNA* **16**, 1–9.
- Konarska, M.M., Vilardell, J., and Query, C.C. (2006). Repositioning of the reaction intermediate within the catalytic center of the spliceosome. *Mol. Cell* **21**, 543–553.
- Lambert, D., Leipply, D., Shiman, R., and Draper, D.E. (2009). The influence of monovalent cation size on the stability of RNA tertiary structures. *J. Mol. Biol.* **390**, 791–804.
- Madhani, H.D., and Guthrie, C. (1994). Randomization-selection analysis of snRNAs in vivo: evidence for a tertiary interaction in the spliceosome. *Genes Dev.* **8**, 1071–1086.
- Mattick, J.S. (1994). Introns: evolution and function. *Curr. Opin. Genet. Dev.* **4**, 823–831.
- McConnell, T.S., Herschlag, D., and Cech, T.R. (1997). Effects of divalent metal ions on individual steps of the *Tetrahymena* ribozyme reaction. *Biochemistry* **36**, 8293–8303.
- Messerschmidt A., Huber R., Poulos T., and Wieghardt K., eds. (2001). *Handbook of metalloproteins* (Chichester, UK: Wiley).
- Mikheeva, S., Murray, H.L., Zhou, H., Turczyk, B.M., and Jarrell, K.A. (2000). Deletion of a conserved dinucleotide inhibits the second step of group II intron splicing. *RNA* **6**, 1509–1515.
- Murshudov, G.N., Vagin, A.A., and Dodson, E.J. (1997). Refinement of macromolecular structures by the maximum-likelihood method. *Acta Crystallogr. D Biol. Crystallogr.* **53**, 240–255.
- Padgett, R.A., Podar, M., Boulanger, S.C., and Perlman, P.S. (1994). The stereochemical course of group II intron self-splicing. *Science* **266**, 1685–1688.
- Pingoud, V., Wende, W., Friedhoff, P., Reuter, M., Alves, J., Jeltsch, A., Mones, L., Fuxreiter, M., and Pingoud, A. (2009). On the divalent metal ion dependence of DNA cleavage by restriction endonucleases of the EcoRI family. *J. Mol. Biol.* **393**, 140–160.
- Podar, M., Perlman, P.S., and Padgett, R.A. (1995). Stereochemical selectivity of group II intron splicing, reverse splicing, and hydrolysis reactions. *Mol. Cell Biol.* **15**, 4466–4478.
- Podar, M., Perlman, P.S., and Padgett, R.A. (1998). The two steps of group II intron self-splicing are mechanistically distinguishable. *RNA* **4**, 890–900.
- Pyle, A.M. (2010). The tertiary structure of group II introns: implications for biological function and evolution. *Crit. Rev. Biochem. Mol. Biol.* **45**, 215–232.
- Pyle, A.M., and Lambowitz, A.M. (2006). Group II introns: ribozymes that splice RNA and invade DNA. In *The RNA World*, R.F. Gesteland, T.R. Cech, and J.F. Atkins, eds. (Cold Spring Harbor: Cold Spring Harbor Press), pp. 469–505.
- Query, C.C., and Konarska, M.M. (2004). Suppression of multiple substrate mutations by spliceosomal prp8 alleles suggests functional correlations with ribosomal ambiguity mutants. *Mol. Cell* **14**, 343–354.
- Schmidt, U., Podar, M., Stahl, U., and Perlman, P.S. (1996). Mutations of the two-nucleotide bulge of D5 of a group II intron block splicing in vitro and in vivo: phenotypes and suppressor mutations. *RNA* **2**, 1161–1172.
- Schwer, B., and Guthrie, C. (1992). A conformational rearrangement in the spliceosome is dependent on PRP16 and ATP hydrolysis. *EMBO J.* **11**, 5033–5039.
- Smith, D.J., Query, C.C., and Konarska, M.M. (2008). “Nought may endure but mutability”: spliceosome dynamics and the regulation of splicing. *Mol. Cell* **30**, 657–666.
- Steitz, T.A., and Steitz, J.A. (1993). A general two-metal-ion mechanism for catalytic RNA. *Proc. Natl. Acad. Sci. USA* **90**, 6498–6502.
- Ten Eyck, L.F. (1973). Crystal physics, diffraction, theoretical and general crystallography. *Acta Crystallogr. A* **29**, 183–191.
- Toor, N., Keating, K.S., Taylor, S.D., and Pyle, A.M. (2008a). Crystal structure of a self-spliced group II intron. *Science* **320**, 77–82.
- Toor, N., Rajashankar, K., Keating, K.S., and Pyle, A.M. (2008b). Structural basis for exon recognition by a group II intron. *Nat. Struct. Mol. Biol.* **15**, 1221–1222.

- Toor, N., Keating, K.S., Fedorova, O., Rajashankar, K., Wang, J., and Pyle, A.M. (2010). Tertiary architecture of the *Oceanobacillus iheyensis* group II intron. *RNA* 16, 57–69.
- Viadiu, H., and Aggarwal, A.K. (1998). The role of metals in catalysis by the restriction endonuclease BamHI. *Nat. Struct. Biol.* 5, 910–916.
- Wang, D., Bushnell, D.A., Westover, K.D., Kaplan, C.D., and Kornberg, R.D. (2006). Structural basis of transcription: role of the trigger loop in substrate specificity and catalysis. *Cell* 127, 941–954.
- Wolff, T., Menssen, R., Hammel, J., and Bindereif, A. (1994). Splicing function of mammalian U6 small nuclear RNA: conserved positions in central domain and helix I are essential during the first and second step of pre-mRNA splicing. *Proc. Natl. Acad. Sci. USA* 91, 903–907.
- Yean, S.L., Wuenschell, G., Termini, J., and Lin, R.J. (2000). Metal-ion coordination by U6 small nuclear RNA contributes to catalysis in the spliceosome. *Nature* 408, 881–884.



## EXTENDED EXPERIMENTAL PROCEDURES

### Cloning, Mutagenesis, and In Vitro Transcription

Five different constructs of the *Oceanobacillus iheyensis* group II intron were used in this work. The wild-type intron construct pOiA corresponds to the previously described pOi5 construct (Toor et al., 2008) and it consists of a pBS vector (Invitrogen), in which the *O.i.* group II intron sequence (479 nt) flanked by its 5' exon (223 nt) and by its 3' exon (101 nt) was cloned immediately downstream of a T7 promoter and immediately upstream of a ClaI restriction site. pOiA was used for the analysis of splicing kinetics. The OiD1-5 construct was derived from the crystallization construct described previously (Toor et al., 2008) by removing the exons and domain 6. This construct was used to crystallize the excised intron structures in the substrate-free state, in the presence of all ion substituents, and in the presence of the exon-like oligonucleotide. It was cloned immediately downstream of a T7 promoter and it contains a BamHI restriction site immediately downstream of D5. The Oi5eD1-5 construct, derived from OiD1-5 by addition of the 5' exon 5'-UUUAU, was used to crystallize the intron in the states preceding and following 5' exon hydrolysis. Both OiD1-5 and Oi5eD1-5 constructs are engineered with the same truncations in D2, D3, and D4 that were previously used to favor crystallization (Toor et al., 2010; Toor et al., 2008). Finally, the OiD1-5-C377G and the pOiA-C377N and pOiA-G288N constructs, derived from OiD1-5 and pOiA by introducing single point mutations in the indicated positions, were used for crystallization and splicing, respectively. All mutagenesis experiments were performed by using the PfuUltra II Hotstart PCR Master Mix (Agilent). The restriction enzymes ClaI and BamHI used for template linearization were purchased from NEB. All constructs were confirmed by DNA sequencing (W. M. Keck Foundation Biotechnology Resource Laboratory, Yale University).

### Crystallization

Crystals were grown by using 2  $\mu$ l sample drops and 300  $\mu$ l crystallization solution in a sealed chamber (EasyXtal 15-Well Tool, QIAGEN). The oligonucleotides used in the cocrystallization experiments were chemically synthesized with a MerMade 6 RNA-DNA synthesizer (BioAutomation), deprotected (Wincott et al., 1995), purified on 20% polyacrylamide gels (Pyle and Green, 1994) and dissolved to 1 mM in RNA storage buffer (10 mM Na-MOPS pH 6.0, 1 mM Na-EDTA). Crystals were harvested after 2 – 3 weeks, except those used to solve the structures in the prehydrolytic states, which were frozen within 36 hr. Crystals were cryo-protected in a solution containing the corresponding crystallization buffers supplemented with 25% EG, 0.2 mM spermine, and 100  $\mu$ M of the oligonucleotide if appropriate and immediately flash frozen in N<sub>2</sub>(l).

The crystallization solutions used to solve the structures of the excised intron presented in this work were composed of: (1) 100 mM K-Acetate, 100 mM KCl, 100 mM CaCl<sub>2</sub>, 50 mM Na-HEPES pH 7.0, 3% PEG 8000 for the calcium data set representing the state preceding 5' exon hydrolysis; (2) 100 mM Mg-Acetate, 150 mM KCl, 10 mM LiCl, 50 mM Na-HEPES pH 7.0, 4% PEG 8000 for the potassium data set representing the state following 5' exon hydrolysis; (3) 100 mM K-Acetate, 100 mM KCl, 100 mM CaCl<sub>2</sub>, 50 mM Na-HEPES pH 7.0, 5% PEG 8000 in the presence of the 10-mer RNA 5'-CGAUUUUAUUA-3' for the calcium data set used to describe the state preceding oligonucleotide hydrolysis; (4) 100 mM Mg-Acetate, 200 mM KCl, 50 mM Na-HEPES pH 7.0, 6% PEG 8000 in the presence of the 8-mer RNA 5'-AUUUUAUUA-3' for the potassium data set representing the state following oligonucleotide hydrolysis; (5) 100 mM Mg-Acetate, 200 mM KCl, 50 mM LiCl, 50 mM Na-HEPES pH 7.0, 4% PEG 8000 for the potassium data set representing the substrate-free state; (6) 100 mM Mg-Acetate, 150 mM RbCl, 50 mM Na-HEPES pH 7.0, 4% PEG 8000 for the rubidium data set; (7) 100 mM Mg-Acetate, 200 mM CsCl, 50 mM Na-HEPES pH 7.0, 4% PEG 8000 for the cesium data set; (8) 100 mM Mg-Acetate, 10 mM Tl-Acetate, 50 mM Na-HEPES pH 7.0, 5% PEG 8000 for the thallium data set; (9) 100 mM K-Acetate, 100 mM KCl, 150 mM BaCl<sub>2</sub>, 50 mM Na-HEPES pH 7.0, 6% PEG 8000 for the barium data set; (10) 100 mM K-Acetate, 100 mM KCl, 100 mM CaCl<sub>2</sub>, 50 mM Na-HEPES pH 7.0, 5% PEG 8000 in the presence of the 8-mer RNA 5'-AUUUUAUUA-3' for the calcium data set used for the calculation of the anomalous scattering Fourier electron density map; (11) 100 mM Mg-Acetate, 150 mM NaCl, 50 mM Na-HEPES pH 7.0, 5% PEG 8000 for the sodium data set; (12) 100 mM Mg-Acetate, 100 mM LiCl, 50 mM Na-HEPES pH 7.0, 3% PEG 8000 for the lithium data set representing the state following 5' exon hydrolysis; (13) 100 mM Mg-Acetate, 200 mM NH<sub>4</sub>Cl, 50 mM Na-HEPES pH 7.0, 3% PEG 8000 for the ammonium data set; and (14) 100 mM Mg-Acetate, 150 mM KCl, 10 mM LiCl, 50 mM Na-HEPES pH 7.0, 5% PEG 8000 for the potassium data set of the C377G intron mutant.

### Splicing Assays

For splicing, the purified radiolabeled intron precursor was refolded by denaturation at 95°C for 1 min in the presence of 40 mM Na-MOPS pH 7.5, and cooled at room temperature for 2 min. Subsequently, the appropriate monovalent ions were added to a final concentration of 150 mM as indicated in the text. Finally, MgCl<sub>2</sub> was added to a final concentration of 5 mM to start the splicing reaction, unless indicated otherwise. Because of the insolubility of TlCl, the reaction in the presence of thallium was started by adding 150 mM Tl-acetate and 10 mM Mg-acetate. We noticed that Tl<sup>+</sup> induces rapid accumulation of intermediate by increasing the rate for the first splicing step by 2-fold, while leaving the second step unaffected (see Figure 2 in the main text). The refolded precursor samples were incubated at 37°C. 1  $\mu$ l aliquots of the splicing reactions taken at specific time-points were quenched by addition of 20  $\mu$ l gel loading solution containing urea and chilled on ice. The samples were analyzed onto a denaturing 5% (w/v) polyacrylamide gel (Pyle and Green, 1994). The kinetic rate constants were calculated by using the software KinTek Explorer (KinTek Corporation).

### Analysis of the Splicing Products

The identity of the RNA gel bands was determined by reverse transcription (RT) followed by PCR (RT-PCR) (Higuchi et al., 1993), whereas the 5' end homogeneity of the excised species was determined by primer extension (Boorstein and Craig, 1989; Marqués et al., 1993). All primers and reagents used are listed below. Although the major product involved cleavage at the expected 5' splice site, the analysis revealed cleavage at cryptic IBS1 positions within the 5' exon at nucleotides (–11) and (–10) from the 5' end of the intron.

### Primers

The primers used for reverse transcription (RT) followed by PCR (RT-PCR) were A (5'- CGAATTGGAGCTCCACCG, complementary to the 5' end of the precursor), B (5'- GGCATGGGTGCAGTCTATAGG, complementary to the 5' end of the intron), C (5'- GAGTA GAAGGGAGCGACTAACCC, complementary to the 3' end of the intron) and D (5'- CGATAAGCTTGATATTCGCCAAG, complementary to the 3' end of the precursor). The primer used for primer extension on the linear intron/3' exon intermediate and on the linear intron was primer E (5'- CCATGTCGCCACGGACACC, complementary to the position 82–100 of the intron). Superscript II reverse transcriptase (Invitrogen) was used according to the manufacturer instructions in all RT reactions and the Sequenase 2.0 DNA Sequencing Kit (Affimetrix) was used to produce the sequencing ladder in the primer extension experiment.

### SUPPLEMENTAL REFERENCES

- Boorstein, W.R., and Craig, E.A. (1989). Primer extension analysis of RNA. *Methods Enzymol.* *180*, 347–369.
- Chanfreau, G., and Jacquier, A. (1993). Interaction of intronic boundaries is required for the second splicing step efficiency of a group II intron. *EMBO J.* *12*, 5173–5180.
- de Lencastre, A., Hamill, S., and Pyle, A.M. (2005). A single active-site region for a group II intron. *Nat. Struct. Mol. Biol.* *12*, 626–627.
- Higuchi, R., Fockler, C., Dollinger, G., and Watson, R. (1993). Kinetic PCR analysis: real-time monitoring of DNA amplification reactions. *Biotechnology (N. Y.)* *11*, 1026–1030.
- Keating, K.S., Toor, N., Perlman, P.S., and Pyle, A.M. (2010). A structural analysis of the group II intron active site and implications for the spliceosome. *RNA* *16*, 1–9.
- Marqués, S., Ramos, J.L., and Timmis, K.N. (1993). Analysis of the mRNA structure of the *Pseudomonas putida* TOL meta fission pathway operon around the transcription initiation point, the xylTE and the xylFJ regions. *Biochim. Biophys. Acta* *1216*, 227–236.
- Pyle, A.M. (2010). The tertiary structure of group II introns: implications for biological function and evolution. *Crit. Rev. Biochem. Mol. Biol.* *45*, 215–232.
- Pyle, A.M., and Green, J.B. (1994). Building a kinetic framework for group II intron ribozyme activity: quantitation of interdomain binding and reaction rate. *Biochemistry* *33*, 2716–2725.
- Toor, N., Keating, K.S., Taylor, S.D., and Pyle, A.M. (2008). Crystal structure of a self-spliced group II intron. *Science* *320*, 77–82.
- Toor, N., Keating, K.S., Fedorova, O., Rajashankar, K., Wang, J., and Pyle, A.M. (2010). Tertiary architecture of the *Oceanobacillus iheyensis* group II intron. *RNA* *16*, 57–69.
- Wincott, F., DiRenzo, A., Shaffer, C., Grimm, S., Tracz, D., Workman, C., Sweedler, D., Gonzalez, C., Scaringe, S., and Usman, N. (1995). Synthesis, deprotection, analysis and purification of RNA and ribozymes. *Nucleic Acids Res.* *23*, 2677–2684.

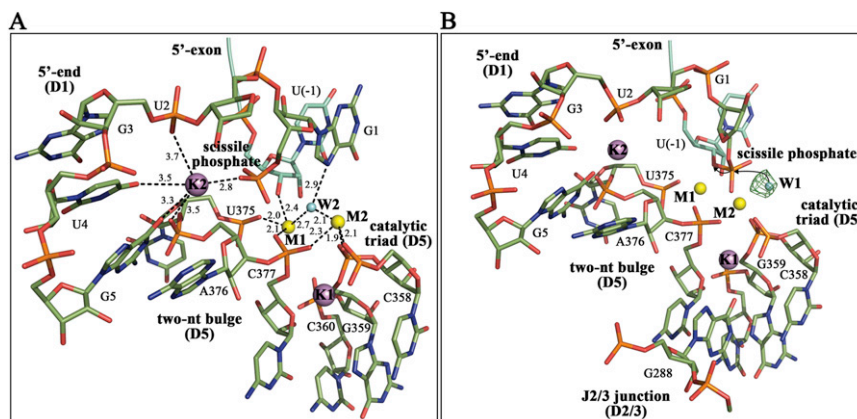

**Figure S1. The Mechanism of 5' Exon Hydrolysis, Related to Figure 1**

(A) Structure of Oi5eD1-5 after 5' exon hydrolysis. Upon hydrolysis, G1 inserts into the active site establishing a hydrogen bond with a solvent molecule (W2) that bridges the catalytic metals M1 and M2, and a base-stacking interaction with the uracil moiety of the last nucleotide of the 5' exon (U-1). In such a conformation, G1 would compete with the 3' splice junction for the second step of splicing. Possibly, the previously characterized interaction between G1 and the penultimate intron position (Chanfreau and Jacquier, 1993) and the transient disruption of the metal cluster described in this work would hold G1 out of the active site and allow for an efficient second step of splicing.

(B) The reaction nucleophile for the 5' exon hydrolysis reaction. The figure represents the structure of Oi5eD1-5 in the prehydrolytic state in the presence of  $K^+$  /  $Ca^{2+}$ . The  $F_o - F_c$  simulated-annealing electron density omit-map for the proposed reaction nucleophile is depicted in green mesh at  $3.5 \sigma$  around the corresponding molecule (W1).



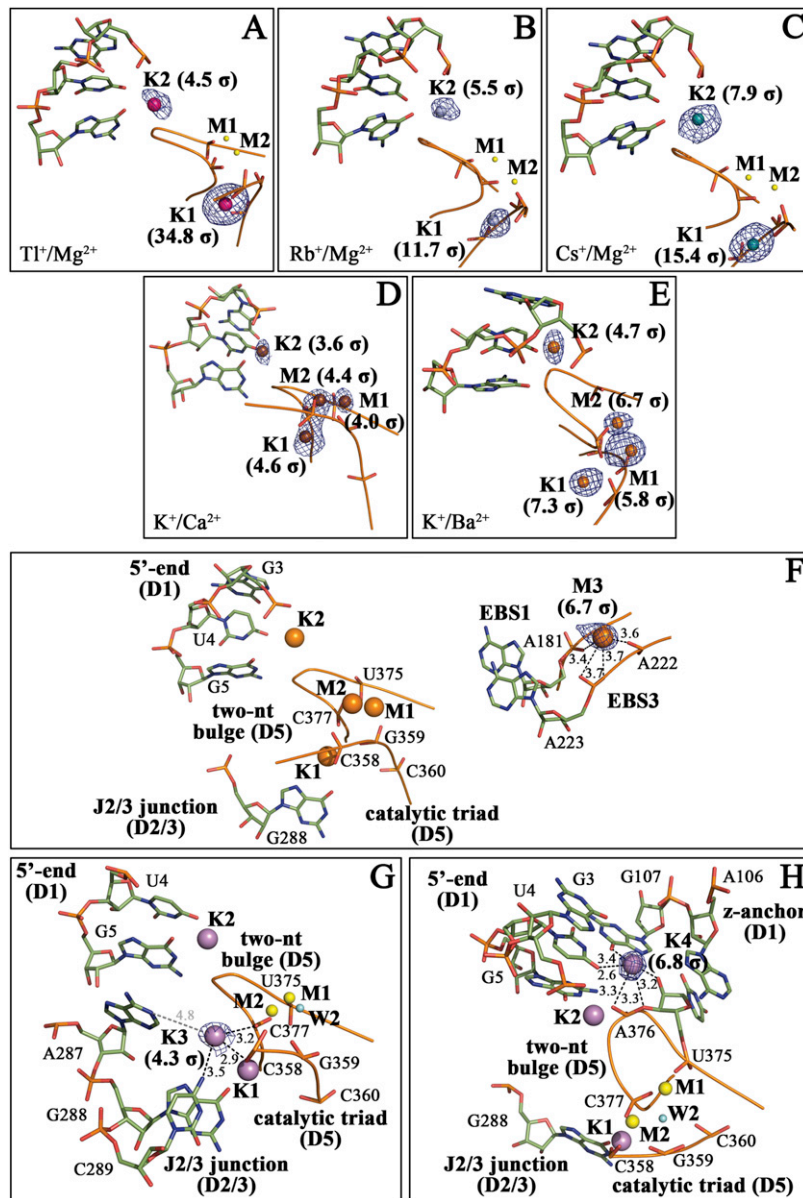

**Figure S2. Characterization of the Metal Ion Binding Sites, Related to Figure 2**

(A–E) Anomalous difference Fourier electron density maps for the active-site metals.  $\text{Tl}^+$ ,  $\text{Rb}^+$ , and  $\text{Cs}^+$  bind specifically to the K1 and K2 sites, but not to the M1 and M2 sites, which are occupied by  $\text{Mg}^{2+}$  in all of these structures. Instead,  $\text{Ba}^{2+}$ , which possesses an identical ionic radius to that of  $\text{K}^+$  (Table S3), binds both to the M1 and M2 sites and to the K1 and K2 sites. These observations indicate that the M1–M2 and the K1–K2 sites have different selectivity requirements in terms of ionic charge and radius, respectively. For the  $\text{K}^+/\text{Ca}^{2+}$  structure, it needs to be considered that both  $\text{K}^+$  and  $\text{Ca}^{2+}$  possess weak anomalous scattering (see Table S1).

(F) The ion binding site M3. M3, which connects the two exon binding sites (EBS1 and EBS3) as described previously (Toor et al., 2008), binds divalent ions, but not monovalent ions. The depicted anomalous difference map is for  $\text{Ba}^{2+}$ .

(G) The ion binding site K3. K3 is a monovalent ion binding site close to residues C358 (catalytic triad), C377 (two-nucleotide bulge), A287–C289 (J2/3 junction), and to the K1 site. Considering its proximity to A287 (distance in gray), which forms the  $\gamma$ - $\gamma'$  interaction, K3 may play a role during the second step of splicing. The depicted anomalous difference map is for  $\text{Tl}^+$ . Similar signal can be observed for  $\text{Rb}^+$  and  $\text{Cs}^+$  (6.5  $\sigma$  and 3.6  $\sigma$ , respectively, not shown), but not for  $\text{Ba}^{2+}$ .

(H) The ion binding site K4. K4 bridges G107 (D1) with the active site at about 3.5 Å from K2, stabilizing the z-anchor (Toor et al., 2008). The depicted anomalous difference map is for  $\text{Tl}^+$ . Similar signal can be observed for  $\text{Rb}^+$  and  $\text{Cs}^+$  (8.6  $\sigma$  and 14.0  $\sigma$ , respectively, not shown), whereas in the  $\text{Ba}^{2+}$  data set one single  $\text{Ba}^{2+}$  ion replaces both the K2 and the K4 positions (4.7  $\sigma$ ).

All distances are drawn as black dotted lines and indicated in angstroms. The anomalous difference maps are shown in blue mesh at various contour levels (the total peak height of each signal is indicated in parenthesis and is in agreement with the anomalous dispersion term  $\Delta f''$  reported in Table S1 and with the relative occupancies and B-factors of the respective ions). The ions in the cluster are color coded by atom type ( $\text{Tl}^+$ , violet;  $\text{Rb}^+$ , light blue;  $\text{Cs}^+$ , turquoise;  $\text{Mg}^{2+}$ , yellow;  $\text{Ca}^{2+}$ , brown; and  $\text{Ba}^{2+}$ , orange).



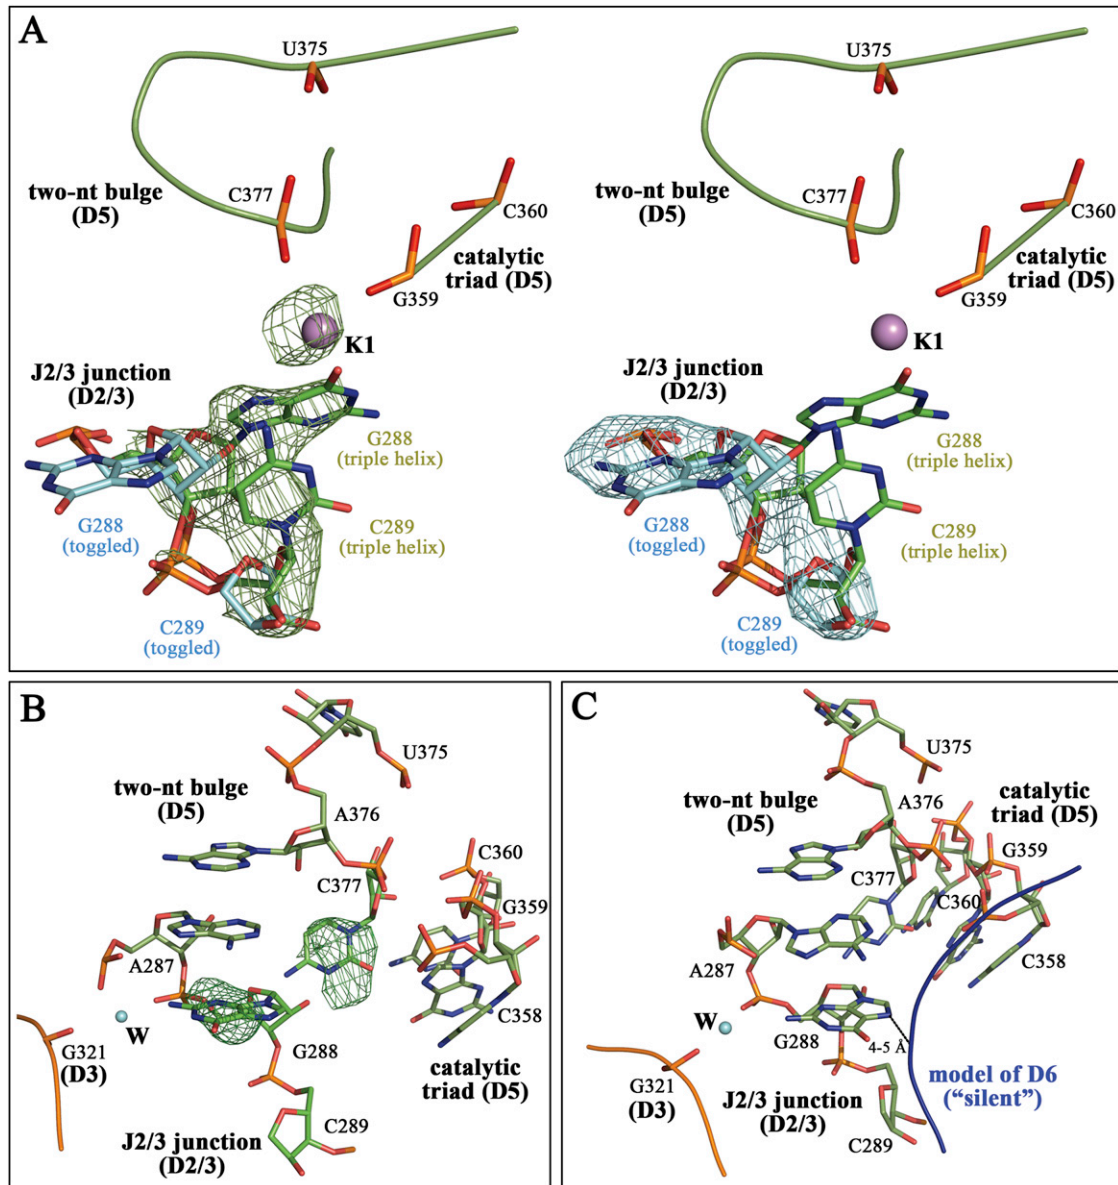

**Figure S4. Toggled Conformation of the J2/3 Junction, Related to Figure 4**

(A) Toggled conformation in the  $\text{Li}^+/\text{Mg}^{2+}$  structure of OI5eD1-5. The figure represents the  $F_o - F_c$  simulated-annealing electron density omit-map calculated omitting the triple helix conformation (left, green mesh,  $3.0 \sigma$ , green sticks and labels) or the toggled conformation of the J2/3 junction (right, cyan mesh,  $3.0 \sigma$ , cyan sticks and labels). The structure suggests the presence of equilibrium between the two conformations in the crystal.

(B) Toggled conformation in the  $\text{Na}^+/\text{Mg}^{2+}$  structure of OI1D1-5 in the absence of substrates. The figure represents the  $F_o - F_c$  simulated-annealing electron density omit-map calculated omitting the base moieties of residues G288/C377 (green mesh,  $3.0 \sigma$ ).

(C) Potential proximity between the J2/3 junction and D6. The structure of the OI1D1-5 substrate-free construct obtained in  $\text{Na}^+/\text{Mg}^{2+}$  shows that the toggled conformation of G288 may create a binding interface for and reach close to residues of D6 near the 3' splice junction. The model of D6 corresponds to its putative "silent" conformation (Pyle, 2010).



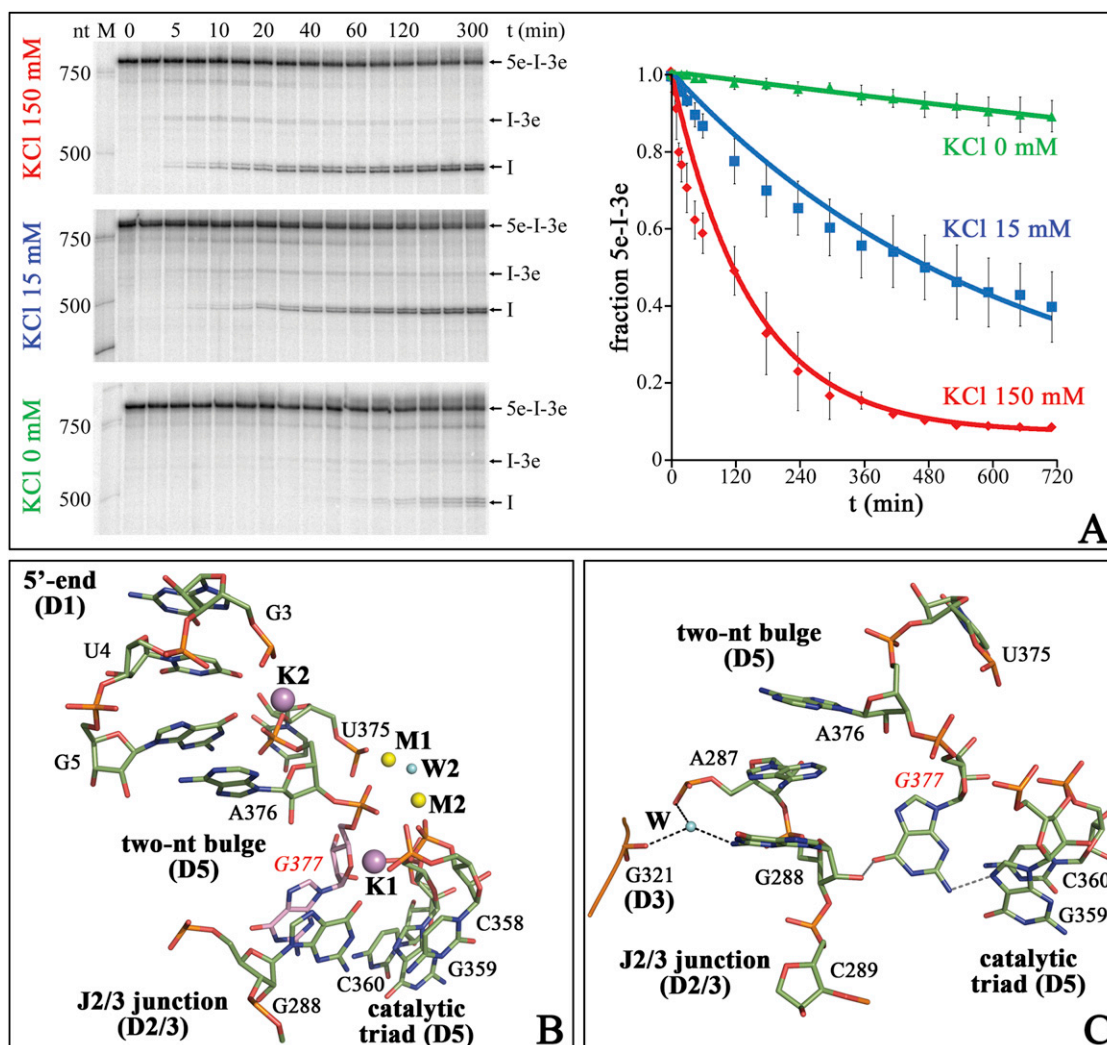

**Figure S5. Effect of Potassium and of Mutations in the Two-Nucleotide Bulge on Group II Intron Splicing, Related to Figure 5**

(A) Wild-type *O.i.* group II intron splices efficiently at physiological  $K^+$  concentrations (150 mM, red), whereas in the absence of  $K^+$  (green) splicing is impaired. Low millimolar  $K^+$  concentrations (15 mM, blue) are sufficient to recover splicing almost completely. The splicing assays reported here were performed in the presence of 100 mM NaCl. Upon splicing, the precursor RNA (5e-I-3e) forms intermediate product (I-3e) and linear intron (I). The sizes of the bands are indicated in nucleotides (nt) by the marker lane (M). The graph on the right shows the evolution of the concentration of precursor over time. The error bars represent the standard deviation calculated from three independent experiments.

(B) Structure of the C377G mutant in the presence of  $K^+$ . The structure solved at 3.2 Å resolution shows that the mutant can form an intact triple helix conformation, similar to the wild-type construct. The mutated residue in the two-nucleotide bulge is labeled in red and colored in pink sticks.

(C) Energy-minimized model for the C377G mutant in the toggled conformation. In such conformation, the mutant may form a network of interactions tighter than wild-type, thus causing the intron to stall between the first and the second steps of splicing.

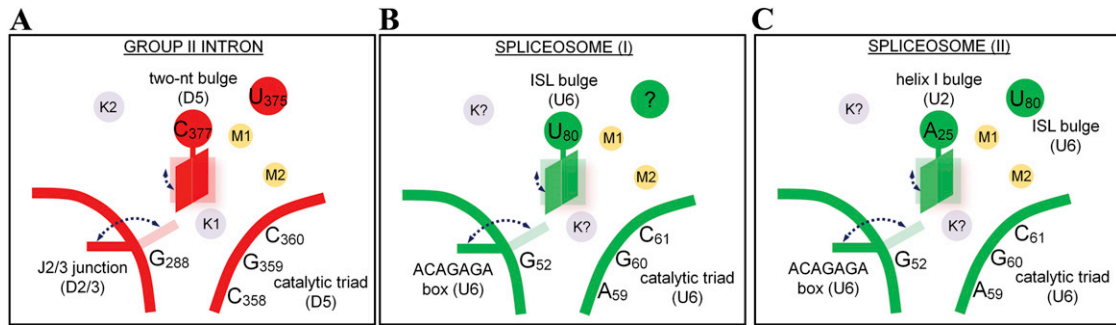

**Figure S6. Hypotheses for Conformational Toggling in the Spliceosome, Related to Figure 7**

(A–C) A conformational toggling similar to that which regulates the transition from the first to the second step of splicing in group II intron (A) may also occur in the spliceosome. Two scenarios can be envisaged. In one case (B), the toggling may bring G52 (ACAGAGA box in U6, analogous to G288 in the intron ([de Lencastre et al., 2005](#); [Keating et al., 2010](#))) close to U80 (ISL bulge in U6, analogous to C377 in the intron). Alternatively (C), the residues involved in the conformational change may be G52 and A25 (helix I bulge, U2). In the latter case, U80 may occupy a position similar to U375 in the intron. By analogy with group II intron, the toggling may be potentially regulated by monovalent metal ions (K?) also in the spliceosome. The toggling nucleotides are shown as solid (toggled) or semi-transparent (triple helix) squares, whereas dotted dark blue arrows indicate their movement. In (B and C), the numbering corresponds to the yeast spliceosome.
